# Supplementary material for: Mapping Neutrophil Fate and Function in Ischemic Stroke: A Single-cell Roadmap for Translational Insights
Source: Research Square preprint supplement (doi:10.21203/rs.3.rs-5300274/v1), 2024-10-28
Supplement: Supplementary file 1 [file c0b12941579d59a520df22ba.docx]

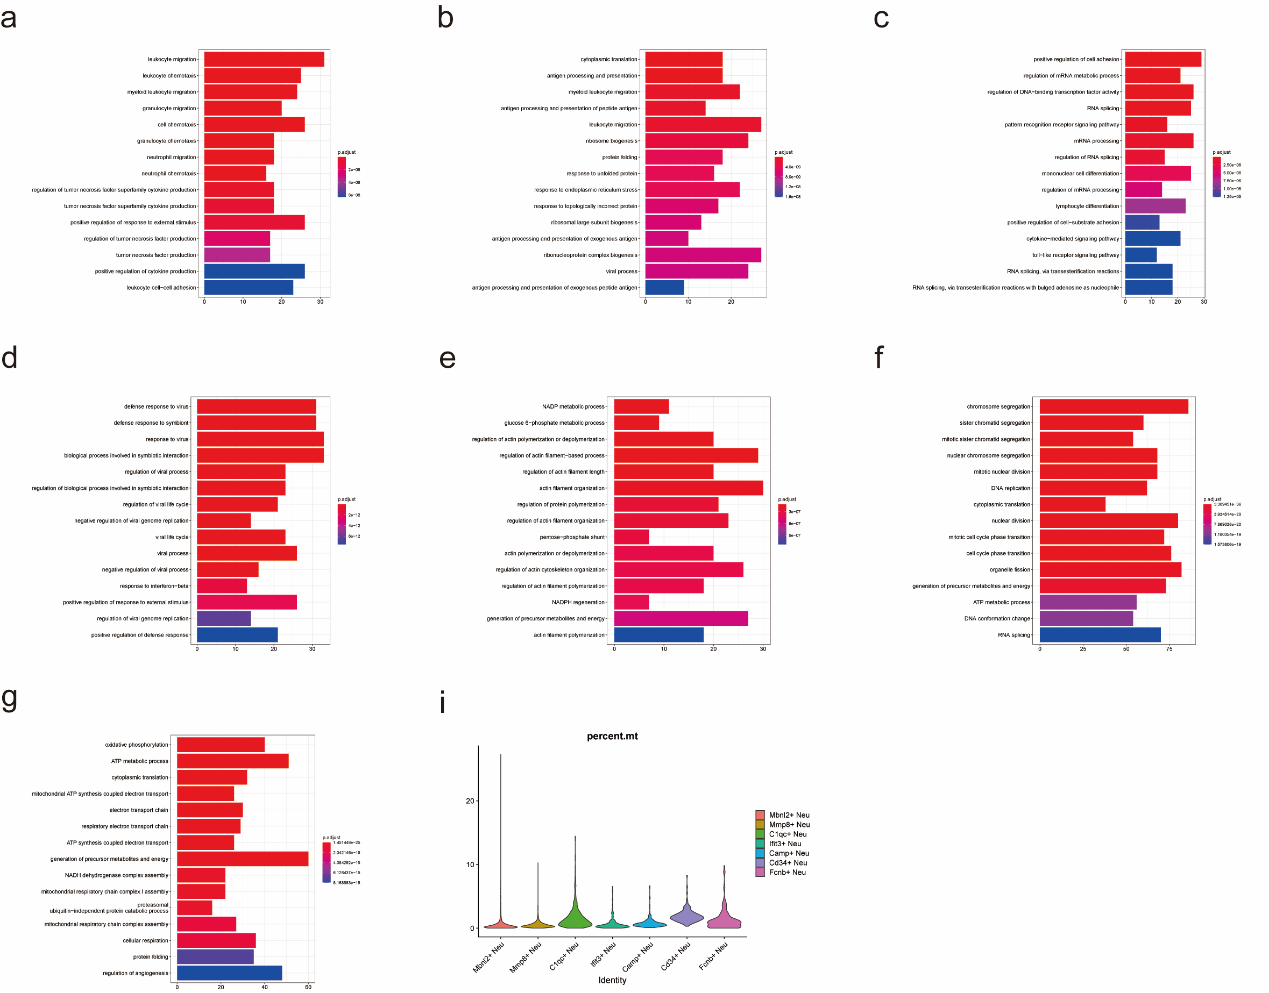


Supplementary Figure S1 Functional Enrichment Analysis Results and Mitochondrial Gene Proportions of Different Neutrophil Clusters. Bar plots illustrating the gene enrichment outcomes for (a) Mmp8+ Neu, (b) C1qc+ Neu, (c) Mbnl2+ Neu, (d) Ifit3+ Neu, (e) Camp+ Neu, (f) Fcnb+ Neu and (g) Cd34+ Neu. (i) Violin plot depicting the distribution of mitochondrial gene ratios across various neutrophil clusters.


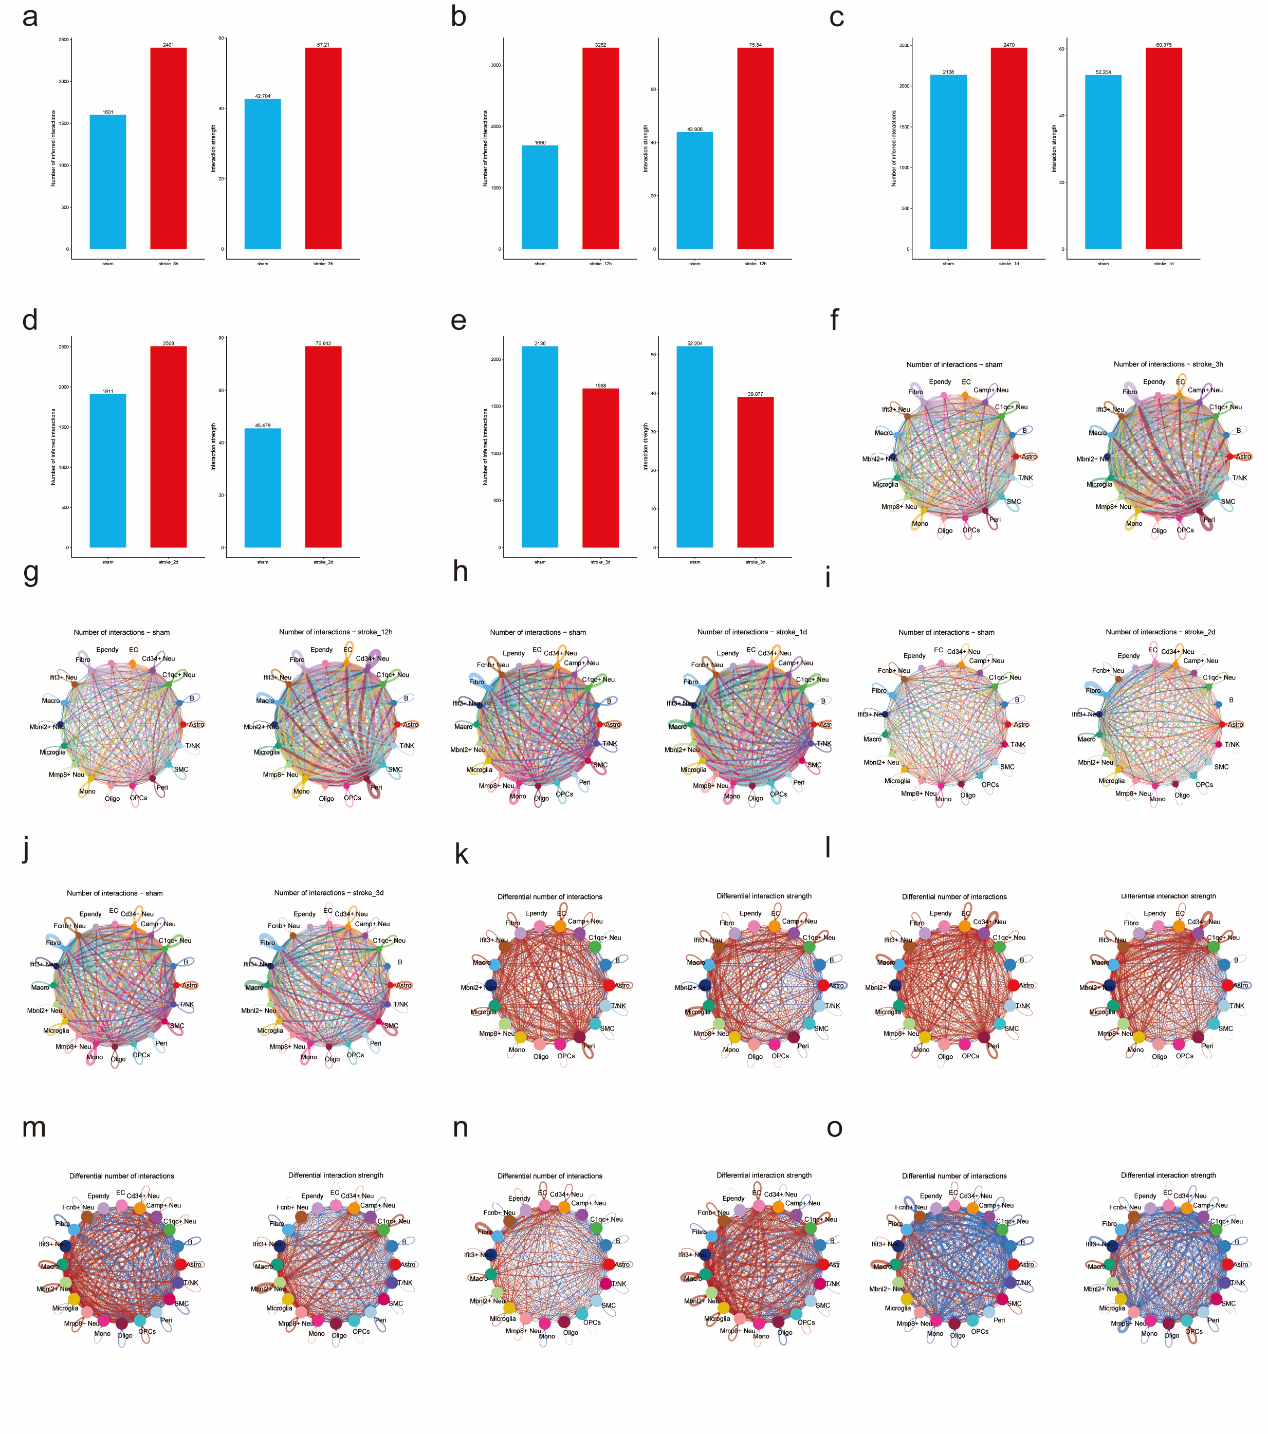


Supplementary Figure S2 Variations in Cellular Communications between Sham and Stroke Groups. (a-e) Values representing the numbers and strength of cellular communications in sham and stroke groups across different time points. (f-j) Interactions of neutrophil clusters with other clusters in the context of sham and stroke conditions at varying time points. (k-o) Differential interactions of neutrophil clusters with other clusters when comparing stroke to control groups at successive time points.


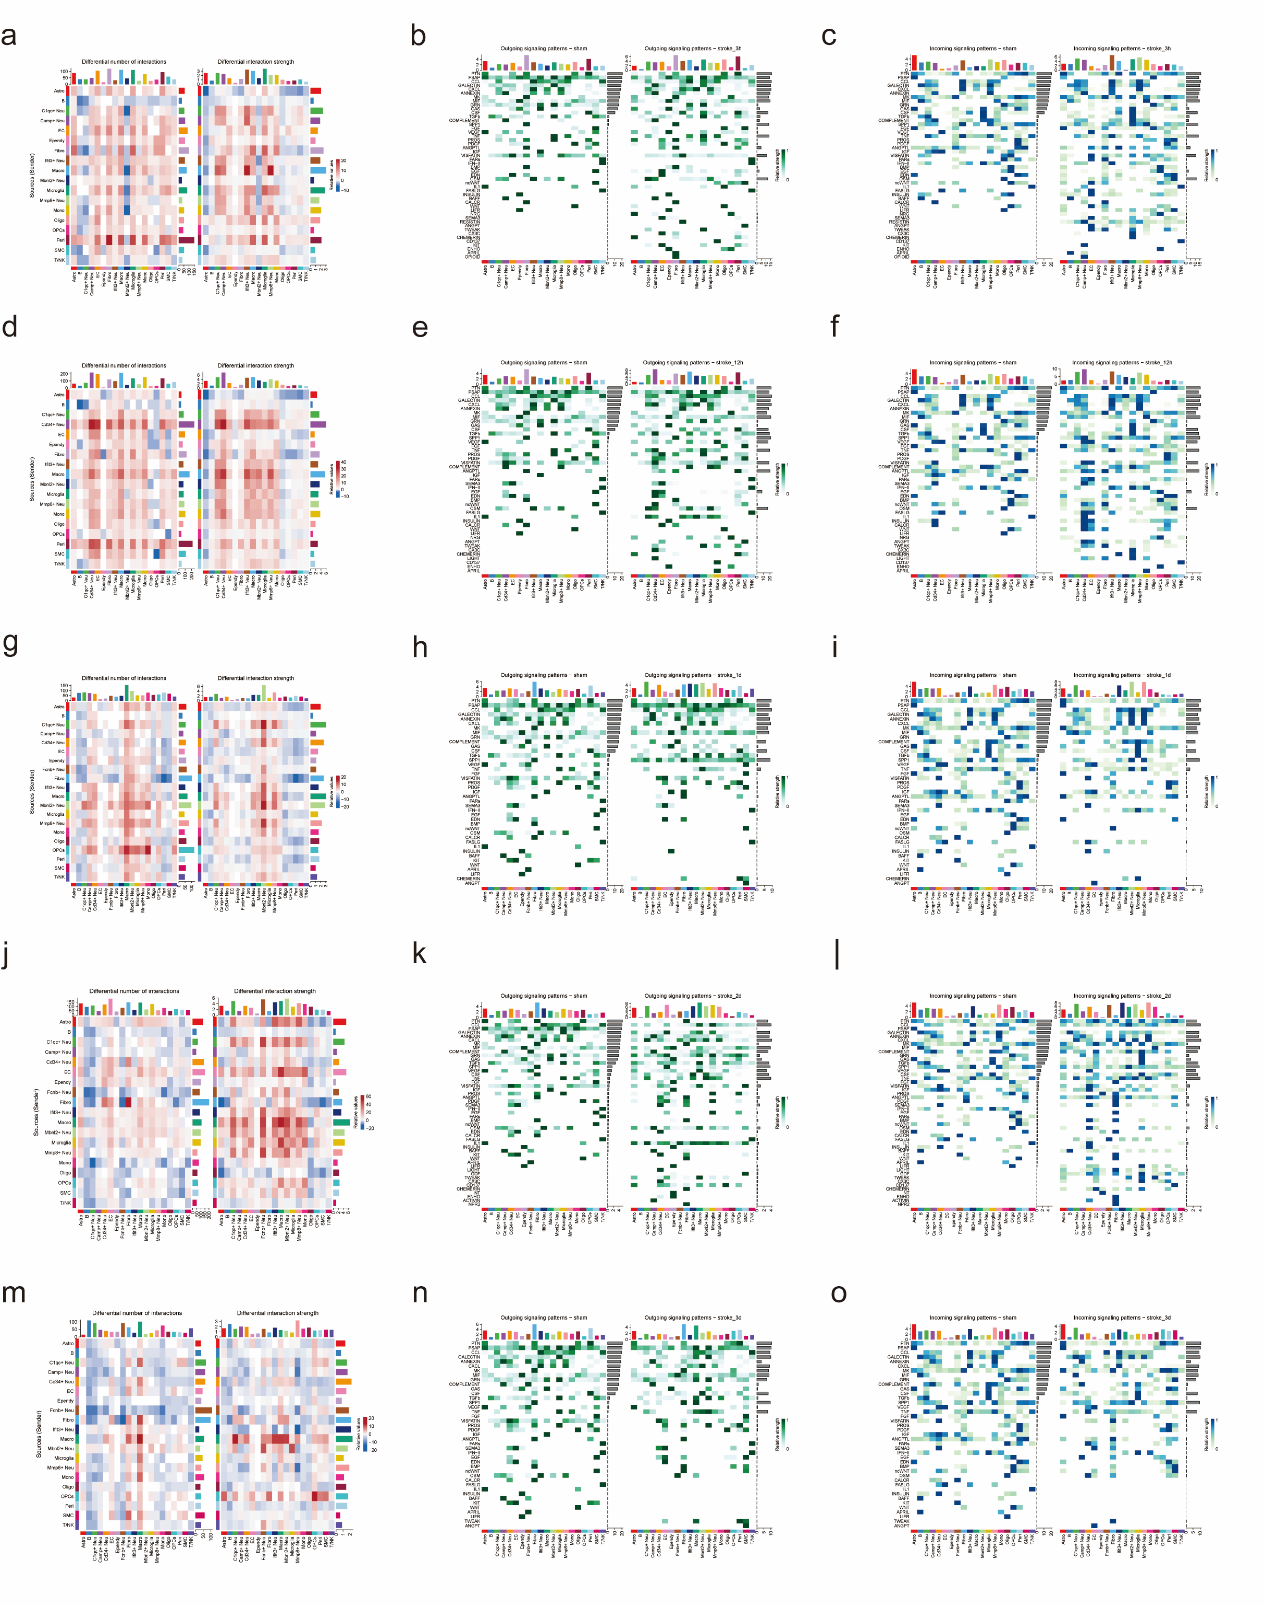


Supplementary Figure S3 Alterations in Cellular Communications in Stroke Group Compared to Sham at Different Time Points. Heatmaps illustrating variations in the number and strength of communications between different cells in the stroke group compared to the sham group at distinct time points (a, d, g, j, m). Heatmaps depicting changes in the intensity of signaling pathways initiated by different cells in the stroke group relative to the sham group at different time points (b, e, h, k, n). Heatmaps showing alterations in the intensity of signaling pathways received by different cells in the stroke group compared to the sham group at varied time points (c, f, i, l, o).
